# Supplementary material for: Equity of financial protection for health in high-income countries: scoping review protocol
Source: PubMed Central journal article supplement — BMJ Open. 2024 Nov 21;14(11):e081029. doi: 10.1136/bmjopen-2023-081029 (PMC11590790; doi:10.1136/bmjopen-2023-081029), 2024-11-21
Supplement: bmjopen-14-11-s001.pdf [file bmjopen-14-11-s001.pdf]

## Supplement

**Table 1 Embase search strategy**

| Database        | Embase                                                                                                                                                                                                                                                                                                                                                                                                                                                                                                                                                                                                                                                                                                                                                                                                                                                                                                                                                                                                                                                                                                                                                                                                                                                                                                                                                                                                                                                                                                                                                                                                                                                                                                                                                                                                                                                                                                                                                                                                                                                                                                                                                                                                                                                                                                                                                                                                                                                                                                                                                                                                                                                 |
|-----------------|--------------------------------------------------------------------------------------------------------------------------------------------------------------------------------------------------------------------------------------------------------------------------------------------------------------------------------------------------------------------------------------------------------------------------------------------------------------------------------------------------------------------------------------------------------------------------------------------------------------------------------------------------------------------------------------------------------------------------------------------------------------------------------------------------------------------------------------------------------------------------------------------------------------------------------------------------------------------------------------------------------------------------------------------------------------------------------------------------------------------------------------------------------------------------------------------------------------------------------------------------------------------------------------------------------------------------------------------------------------------------------------------------------------------------------------------------------------------------------------------------------------------------------------------------------------------------------------------------------------------------------------------------------------------------------------------------------------------------------------------------------------------------------------------------------------------------------------------------------------------------------------------------------------------------------------------------------------------------------------------------------------------------------------------------------------------------------------------------------------------------------------------------------------------------------------------------------------------------------------------------------------------------------------------------------------------------------------------------------------------------------------------------------------------------------------------------------------------------------------------------------------------------------------------------------------------------------------------------------------------------------------------------------|
| Host            | Ovid                                                                                                                                                                                                                                                                                                                                                                                                                                                                                                                                                                                                                                                                                                                                                                                                                                                                                                                                                                                                                                                                                                                                                                                                                                                                                                                                                                                                                                                                                                                                                                                                                                                                                                                                                                                                                                                                                                                                                                                                                                                                                                                                                                                                                                                                                                                                                                                                                                                                                                                                                                                                                                                   |
| Search strategy | <p>1 (equit* or inequit* or inequalit* or equality or distribution* or pattern* or fairness or gradient*).tw,kf.</p> <p>2 health equity/ or health disparity/ or economic inequality/ or social inequality/</p> <p>3 statistical distribution/ or exp socioeconomic distribution/</p> <p>4 1 or 2 or 3</p> <p>Annotation: concept: distribution</p> <p>5 (health care or healthcare or health-care or (health adj2 service) or (health adj2 system) or (health adj2 sector)).tw,kf.</p> <p>6 exp health care/</p> <p>7 ((health or healthcare or health-care or health care) adj2 (coverage or insurance)).tw,kf.</p> <p>8 exp health insurance/</p> <p>9 insurance/ or social insurance/</p> <p>10 5 or 6</p> <p>11 9 and 10</p> <p>12 5 or 6 or 7 or 8 or 11</p> <p>13 ((out-of-pocket or out of pocket or catastrophic or impoverishing) adj4 (spend* or expend* or cost* or expens* or payment*)).tw,kf.</p> <p>14 (financial adj3 (protection* or risk protection* or coverage or risk sharing or risk pooling or hardship* or barrier* or assist*)).tw,kf.</p> <p>15 (cost-sharing or cost sharing or social health protection\$1 or social protection\$1 in health or cash transfer\$1 or cash grant\$1 or monetary grant\$1 or non-monetary grant\$1 or non monetary grant\$1 or social welfare or social assistance or social grant\$1 or social safety net or social safety-net or sociali?ed healthcare or sociali?ed health care or sociali?ed health-care or social security or health security or healthcare security or health care security or health-care security).tw,kf.</p> <p>16 exp health care financing/</p> <p>17 13 or 14 or 15 or 16</p> <p>18 (Andorra or Greece or Poland or Antigua or Barbuda or Greenland or Portugal or Aruba or Guam or Puerto Rico or Australia or Hong Kong or Qatar or Austria or Hungary or Romania or Bahamas or Iceland or San Marino or Bahrain or Ireland or Saudi Arabia or Barbados or Isle of Man or Seychelles or Belgium or Israel or Singapore or Bermuda or Italy or Sint Maarten or British Virgin Islands or Japan or Slovak Republic or Slovakia or Brunei or Korea or Slovenia or Canada or Kuwait or Spain or Cayman Islands or Latvia or (Saint Kitts and Nevis) or (Saint Christopher and Nevis) or Channel Islands or Liechtenstein or Saint Martin or Chile or Lithuania or Sweden or Croatia or Luxembourg or Switzerland or Cura?ao or Macao or Taiwan or Cyprus or Malta or Trinidad or Tobago or Czech Republic or Czech or Monaco or (Turks and Caicos) or Denmark or Nauru or United Arab Emirates or Estonia or Netherlands or United Kingdom or England or Wales</p> |

|              |                                                                                                                                                                                                                                                                                                                                                                                                                                                                                                                                       |
|--------------|---------------------------------------------------------------------------------------------------------------------------------------------------------------------------------------------------------------------------------------------------------------------------------------------------------------------------------------------------------------------------------------------------------------------------------------------------------------------------------------------------------------------------------------|
|              | <p>or Scotland or Northern Ireland or Faroe Islands or New Caledonia or United States or Finland or New Zealand or Uruguay or France or Northern Mariana Islands or Virgin Islands or French Polynesia or Norway or Germany or Oman or Gibraltar or Panama).tw. (3065986)</p> <p>19 (high and income and (countr\$ or nation\$)).tw,kf.</p> <p>20 high income country/</p> <p>21 17 or 18 or 19</p> <p>22 4 and 12 and 16 and 20</p> <p>23 limit 22 to (human and yr="2010 - 2024" and (article or article in press or "review"))</p> |
| Restrictions | 2010 to current                                                                                                                                                                                                                                                                                                                                                                                                                                                                                                                       |
|              |                                                                                                                                                                                                                                                                                                                                                                                                                                                                                                                                       |

**Table 2 Criteria and definitions for study selection**

| Criteria                                  | Inclusion                                                                                                                                                                   | Exclusion                                                                                                      |
|-------------------------------------------|-----------------------------------------------------------------------------------------------------------------------------------------------------------------------------|----------------------------------------------------------------------------------------------------------------|
| <b>Setting</b>                            | Countries listed in the 2023 World Bank classification of "high-income"                                                                                                     | Title, abstract, and keywords did not include high-income countries as a subject of analysis (World Bank 2023) |
| <b>Focus on FP</b>                        | Unit of analysis is the impact of FP or lack of FP                                                                                                                          | FP is not the focus                                                                                            |
| <b>Outcomes or methodologies</b>          | Must address distribution of FP, by addressing at least 1 of the 3 sub-criteria below                                                                                       | Does not address distribution of FP in <i>any</i> of the 3 sub-criteria below                                  |
|                                           | 1. Variables, factors, dimensions or determinants of <i>distribution</i> used to disaggregate FP, e.g. age, sex, geography, illness type, payment type, household type etc. | No disaggregation                                                                                              |
|                                           | 2. Indicators of FP or methodologies of measuring FP <i>distribution</i> , e.g. OOP spending, concentration index, unmet need, impoverishment, medical expenditure          | No quantitative analysis of FP distribution                                                                    |
|                                           | 3. FP <i>distributional</i> outcomes in the HIC(s)<br>Distribution of FP according to the variables (RQ1) selected by the authors                                           | No outcomes reported                                                                                           |
| <b>Focus on essential health services</b> | Focus on <i>essential health services</i> within a UHC framework                                                                                                            | Focus on non-health or non-essential health services                                                           |
| <b>Focus on general populations</b>       | Unit of analysis is regional (bounded by a <i>health system</i> ) or national <i>general population</i>                                                                     | Population is artificially constructed or disaggregated at the outset of analysis                              |
| <b>Language</b>                           | Any                                                                                                                                                                         |                                                                                                                |
| <b>Date</b>                               | Published on or after 2010 January 1                                                                                                                                        | Published before 2010                                                                                          |
| <b>Study design</b>                       | Analyses or evaluations of FP                                                                                                                                               | Research that focusses on preferences, satisfaction, attitudes or beliefs                                      |

|                         |                                                                                                                                                     |                                                                                                                                                                              |
|-------------------------|-----------------------------------------------------------------------------------------------------------------------------------------------------|------------------------------------------------------------------------------------------------------------------------------------------------------------------------------|
| <b>Publication type</b> | Original work<br>Database: peer-reviewed articles or reports in academic journals<br>Grey literature: working papers, reports, government documents | Reprinted work, books, news media, abstract, protocols, conference proceeding, letter to the editor, opinion articles, comments, blog post, podcasts, datasets, infographics |
| <b>Availability</b>     | Full text is accessible through the University of Toronto libraries                                                                                 | Not accessible                                                                                                                                                               |

**Table 3 Data Charting Form**

|                                           |                                                                                                                                                          |
|-------------------------------------------|----------------------------------------------------------------------------------------------------------------------------------------------------------|
| <b>Study ID</b>                           |                                                                                                                                                          |
| <b>Author</b>                             |                                                                                                                                                          |
| <b>Year of publication</b>                |                                                                                                                                                          |
| <b>Title</b>                              |                                                                                                                                                          |
| <b>Study objective(s)</b>                 |                                                                                                                                                          |
| <b>Setting</b>                            |                                                                                                                                                          |
| <b>Study design</b>                       |                                                                                                                                                          |
| <b>Population studied</b>                 |                                                                                                                                                          |
| <b>FP description</b>                     |                                                                                                                                                          |
| <b>Time period of data collection</b>     |                                                                                                                                                          |
| <b>Data source(s)</b>                     |                                                                                                                                                          |
| <b>Determinant factors</b>                | Which factors / grouping variables were considered equity-relevant?                                                                                      |
| <b>FP distribution indicator(s)</b>       | How is FRP characterised?<br>Which indicators, statistics, analytical tools were used to describe or summarize the FP distribution?                      |
| <b>FP distribution</b>                    | What is the distribution of financial risk protection for health and health care in high income countries according to the indicators used in the study? |
| <b>Theory / Model / Framework</b>         | Which theories, frameworks, models, distributive principles, or value judgements were invoked in the analytical design or interpretation of findings?    |
| <b>Health system boundaries</b>           | What is included as health spending / financing in the setting?                                                                                          |
| <b>Limitations</b>                        |                                                                                                                                                          |
| <b>Declared COI and funding source(s)</b> |                                                                                                                                                          |
| <b>Notes</b>                              |                                                                                                                                                          |
